# Supplementary material for: Identification of STXBP2 as a novel susceptibility locus for myocardial infarction in Japanese individuals by an exome-wide association study
Source: PubMed Central journal article supplement (PMC5464887; doi:10.18632/oncotarget.16536), 2017-03-23
Supplement: oncotarget-08-33527-s001.pdf [file oncotarget-08-33527-s001.pdf]

# Identification of *STXBP2* as a novel susceptibility locus for myocardial infarction in Japanese individuals by an exome-wide association study

## SUPPLEMENTARY MATERIALS

### SUPPLEMENTARY FIGURES AND TABLES

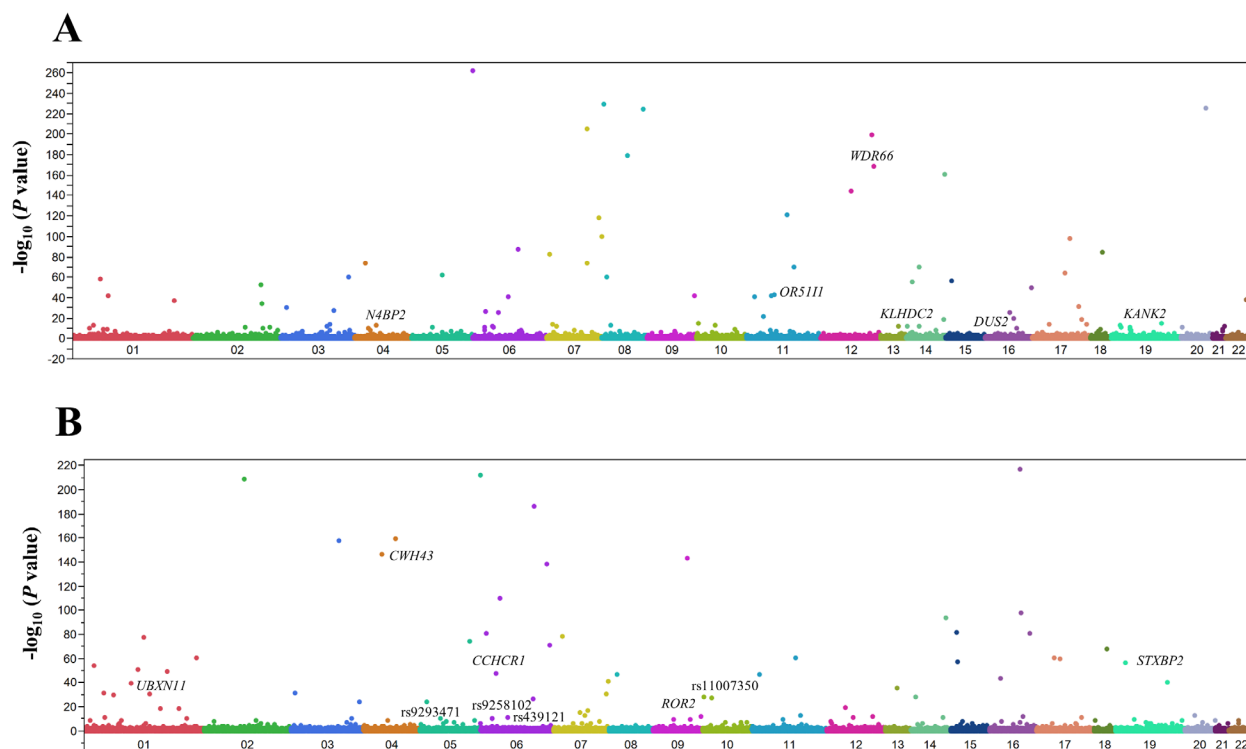

**Supplementary Figure 1:** Manhattan plots for  $P$  values of allele frequencies in the EWAS of CAD (**A**) or MI (**B**). The  $P$  values are shown as  $-\log_{10}(P)$  on the  $y$ -axis with respect to the physical chromosomal position of the corresponding SNP on the  $x$ -axis. SNPs or the corresponding genes identified in the present study are indicated.

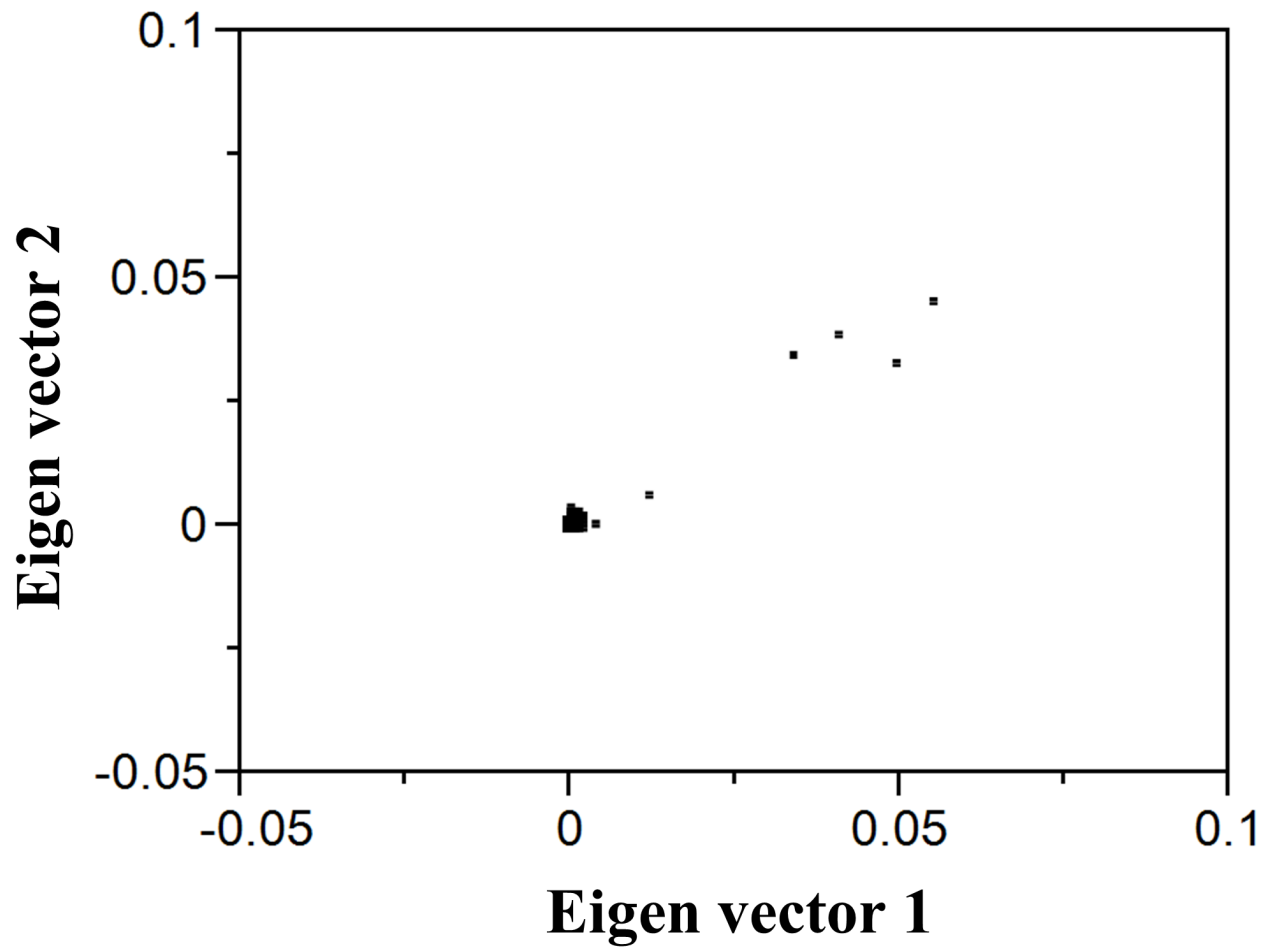

**Supplementary Figure 2: Distribution of samples examined by principal components analysis for population stratification in the EWAS for CAD.** The samples enrolled in the EWAS examined by principal components analysis with the EIGENSTRAT method are plotted according to the first (horizontal axis) and second (vertical axis) principal components.

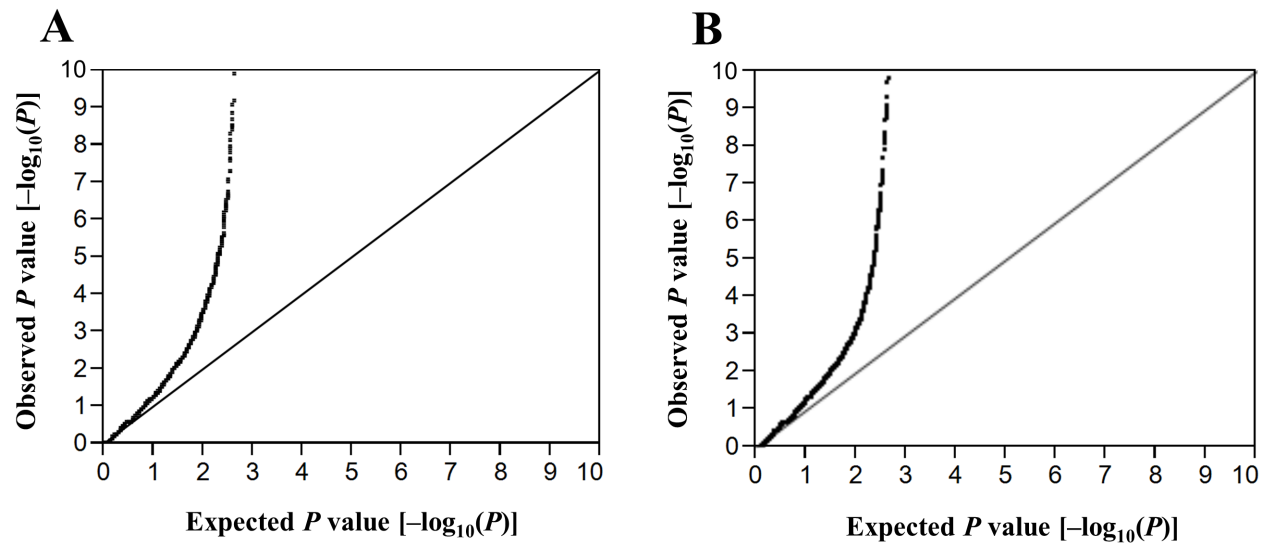

**Supplementary Figure 3:** Quantile-quantile plots for  $P$  values of allele frequencies in the EWASs of CAD (**A**) or MI (**B**). The observed  $P$  values ( $y$ -axis) were compared with the expected  $P$  values ( $x$ -axis) under the null hypothesis, with the values being plotted as  $-\log_{10}(P)$ .

**Supplementary Table 1: The 126 single nucleotide polymorphisms (SNPs) significantly ( $P < 1.21 \times 10^{-6}$ ) associated with coronary artery disease in the exome-wide association study**

See Supplementary File 1

**Supplementary Table 2: Genotype distributions for single nucleotide polymorphisms (SNPs) significantly associated with coronary artery disease in the exome-wide association study**

See Supplementary File 1

**Supplementary Table 3: Relation of single nucleotide polymorphisms (SNPs) to coronary artery disease as determined by multivariable logistic regression analysis**

See Supplementary File 1

**Supplementary Table 4: The 114 single nucleotide polymorphisms (SNPs) significantly ( $P < 1.21 \times 10^{-6}$ ) associated with myocardial infarction in the exome-wide association study**

See Supplementary File 1

**Supplementary Table 5: Genotype distributions for single nucleotide polymorphisms (SNPs) significantly associated with myocardial infarction in the exome-wide association study**

See Supplementary File 1

**Supplementary Table 6: Relation of single nucleotide polymorphisms (SNPs) to myocardial infarction as determined by multivariable logistic regression analysis**

See Supplementary File 1

**Supplementary Table 7: Relation of single nucleotide polymorphisms (SNPs) to intermediate phenotypes of myocardial infarction**

|             | SNP         | Hypertension | DM     | Hyper-TG | Hypo-HDL | Hyper-LDL | CKD    | Obesity | HU     |
|-------------|-------------|--------------|--------|----------|----------|-----------|--------|---------|--------|
| rs202103723 | C/A (P511Q) | 0.5124       | 0.5163 | 0.1918   | 0.0020   | 0.7466    | 0.7494 | 0.0900  | 0.0819 |
| rs188212047 | G/T (L212F) | 0.0757       | 0.2205 | 0.9341   | 0.5152   | 0.8698    | 0.5681 | 0.7313  | 0.5970 |
| rs1265110   | G/A         | 0.4085       | 0.6213 | 0.8101   | 0.1721   | 0.0876    | 0.6498 | 0.5902  | 0.7675 |
| rs138559558 | G/A (R289C) | 0.5494       | 0.7463 | 0.5219   | 0.1377   | 0.4961    | 0.5753 | 0.1021  | 0.3497 |
| rs11007350  | C/T         | 0.6215       | 0.9710 | 0.8261   | 0.0927   | 0.1360    | 0.9195 | 0.8144  | 0.1103 |
| rs9258102   | T/C         | 0.6187       | 0.4197 | 0.9346   | 0.7600   | 0.0049    | 0.6706 | 0.9573  | 0.3608 |
| rs200867550 | C/T (V874I) | 0.7394       | 0.4095 | 0.8579   | 0.6446   | 0.5975    | 0.8403 | 0.8563  | 0.1131 |
| rs9293471   | A/G         | 0.9405       | 0.8981 | 0.7197   | 0.5469   | 0.8744    | 0.8615 | 0.6902  | 0.1117 |
| rs439121    | G/T         | 0.3721       | 0.8296 | 0.5487   | 0.2394   | 0.3338    | 0.1405 | 0.3677  | 0.0504 |

Data are *P* values. The relation of genotypes of each SNP to intermediate phenotypes was examined with Fisher's exact test ( $2 \times 2$ ) or Pearson's chi-square test ( $2 \times 3$ ). DM, diabetes mellitus; hyper-TG, hypertriglyceridemia; hypo-HDL, hypo-HDL-cholesterolemia; hyper-LDL, hyper-LDL-cholesterolemia; CKD, chronic kidney disease; HU, hyperuricemia. Based on Bonferroni's correction, a *P* value of  $<6.94 \times 10^{-4}$  (0.05/72) was considered statistically significant.

**Supplementary Table 8: Relation of chromosomal loci, genes, and single nucleotide polymorphisms (SNPs) identified in the present study to phenotypes previously examined in genome-wide association studies**

See Supplementary File 1
